1 **Novel cerebello-amygdala connections provide missing**  
2 **link between cerebellum and limbic system**

3  
4 **Se Jung Jung<sup>1†</sup>, Ksenia Vlasov<sup>1†</sup>, Alexa D'Ambra<sup>1</sup>, Abhijna Parigi<sup>1</sup>, Mihir Baya<sup>1</sup>,**  
5 **Edbertt Paul Frez<sup>1</sup>, Jacqueline Villalobos<sup>1</sup>, Marina Fernandez-Frentzel<sup>1</sup>, Maribel**  
6 **Anguiano<sup>1</sup>, Yoichiro Ideguchi<sup>1#</sup>, Evan G. Antzoulatos<sup>1,2</sup>, Diasynou Fioravante<sup>1,2\*</sup>.**

7  
8 <sup>1</sup> Center for Neuroscience, University of California Davis, Davis, CA, USA

9 <sup>2</sup>Department of Neurobiology, Physiology and Behavior, University of California Davis,  
10 Davis, CA, USA

11 <sup>†</sup>These authors have contributed equally to this work and share first authorship

12 <sup>#</sup>Current address: Department of Molecular Medicine, The Scripps Research Institute, La Jolla,  
13 California, USA

14

15 **\* Correspondence:**

16 Diasynou Fioravante, PhD

17 [dfioravante@ucdavis.edu](mailto:dfioravante@ucdavis.edu)

18

19 **# of Figures: 6**

20 **# of Tables: 1**

21

22 **Keywords: cerebellar nuclei, BLA, limbic, circuit, electrophysiology,**

23 **channelrhodopsin, anatomy, mouse**

24 **Abstract**

25 The cerebellum is emerging as a powerful regulator of cognitive and affective processing  
26 and memory in both humans and animals and has been implicated in affective disorders.  
27 How the cerebellum supports affective function remains poorly understood. The short-  
28 latency (just a few ms) functional connections that were identified between the cerebellum  
29 and amygdala -a structure crucial for the processing of emotion and valence- more than 4  
30 decades ago raise the exciting, yet untested, possibility that a cerebellum-amygdala  
31 pathway communicates information important for emotion. The major hurdle in rigorously  
32 testing this possibility is the lack of knowledge about the anatomy and functional connectivity  
33 of this pathway. Our initial anatomical tracing studies in mice excluded the existence of a  
34 direct monosynaptic pathway between cerebellum and amygdala. Using transneuronal  
35 tracing techniques, we have identified a novel disynaptic pathway that connects the  
36 cerebellar output nuclei to the basolateral amygdala. This pathway recruits the understudied  
37 intralaminar thalamus as a node. Using ex vivo optophysiology and super-resolution  
38 microscopy, we provide the first evidence for the functionality of the pathway, thus offering a  
39 missing mechanistic link between the cerebellum and amygdala. This discovery provides a  
40 connectivity blueprint between the cerebellum and a key structure of the limbic system. As  
41 such, it is the requisite first step toward obtaining new knowledge about cerebellar function  
42 in emotion, thus fundamentally advancing understanding of the neurobiology of emotion,  
43 which is perturbed in mental and autism spectrum disorders.

44

## 45 **1 Introduction**

46 The cerebellum is increasingly recognized as a regulator of limbic functions<sup>1–8</sup>. The human  
47 cerebellum is activated in response to aversive or threatening cues, upon remembering  
48 emotionally charged events, and during social behavior, reward-based decision making and  
49 violation of expectation<sup>9–18</sup>. Consistent with this, deficits in cerebellar function are  
50 associated with impaired emotional attention and perception, as seen in depression,  
51 anxiety, schizophrenia and post-traumatic stress disorder<sup>19–22</sup>, as well as cognitive and  
52 emotional disturbances collectively known as cerebellar cognitive affective syndrome<sup>23</sup>.  
53 Animal models have recapitulated some of these findings, with selective mutations, damage  
54 or inactivation of the rodent cerebellum resulting in altered acquisition or extinction of  
55 learned defensive responses, and impaired social and goal-directed behavior, without motor  
56 deficits<sup>24–33</sup>.

57  
58 The limited understanding of the anatomical and functional circuits that connect the  
59 cerebellum to limbic centers has impeded mechanistic insight into the neural underpinnings  
60 of cerebellar limbic functions, which have begun to be dissected only recently<sup>30–32,34</sup>.  
61 Moreover, a neuroanatomical substrate for the functional connections between the  
62 cerebellum and a key affective center, the amygdala<sup>35</sup>, has yet to be provided, even though  
63 these connections were observed more than 40 years ago<sup>36–38</sup>. The purpose of the present  
64 work was to generate a mesoscale map of functional neuroanatomical connectivity between  
65 the cerebellum and amygdala. We focused on connections between the deep cerebellar  
66 nuclei (DCN), which give rise to most cerebellar output pathways<sup>39</sup>, and the basolateral  
67 amygdala (BLA), which is known to process affect-relevant salience and valence  
68 information<sup>35,40,41</sup>, and which was targeted in the early electrophysiological studies of Heath  
69 et al.<sup>37,38</sup>.

## 72 **2 Methods**

### 73 **2.1 Mice**

74 C57Bl/6J mice of both sexes were used in accordance with National Institute of Health  
75 guidelines. All procedures were reviewed and approved by the Institutional Animal Care and  
76 Use Committee of the University of California, Davis. Mice were maintained on a 12-hr  
77 light/dark cycle with ad libitum access to food and water. For anatomical tracing

78 experiments, postnatal day P45-65 (at the time of injection) mice were used (N = 13 mice).  
79 For slice optophysiology, P18-25 (at the time of injection) mice were used. (Fig. 3: N = 14  
80 mice; Fig. 5: N = 5 mice; Fig. 6: N = 7 mice).

81

## 82 **2.2 Virus and tracer injections**

83 For stereotaxic surgeries, mice were induced to a surgical plane of anesthesia with 5%  
84 isoflurane and maintained at 1-2% isoflurane. Mice were placed in a stereotaxic frame  
85 (David Kopf Instruments, Tujunga, California) on a feedback-controlled heating pad.  
86 Following skin incision, small craniotomies were made above the target regions with a  
87 dental drill. The following coordinates (in mm) were used (from bregma): for medial DCN -  
88 6.4 AP,  $\pm$  0.75 ML, -2.2 DV; for interposed DCN: -6.3 AP,  $\pm$  1.6 ML, -2.2 DV; for lateral  
89 DCN: -5.7 AP,  $\pm$  2.35 ML, -2.18 DV. For basolateral amygdala: -0.85 AP,  $\pm$  3.08 ML, -4.5  
90 DV. For limbic thalamus: -0.85 AP,  $\pm$  0.3 ML, -3.3 DV, and -1.2 AP,  $\pm$  0.5 ML, -3.5 DV. A  
91 small amount of tracer (50 - 100 nl for DCN, 300 - 500 nl for thalamus) was pressure-  
92 injected in the targeted site with a UMP3-1 ultramicropump (WPI, Sarasota, FL) and glass  
93 pipettes (Wiretrol II, Drummond) (tip diameter: 25-50  $\mu$ m) at a rate of 30 nl/min. The pipette  
94 was retracted 10 min after injection, the skin was sutured (Ethilon P-6 sutures, Ethicon,  
95 Raritan, NJ) and/or glued (Gluture, Abbott labs, Abbott Park, IL) and animal was allowed to  
96 recover completely prior to returning to the home cage. Preoperative analgesia consisted of  
97 a single administration of local lidocaine (VetOne, MWI, Boise, ID; 1 mg/kg) and Meloxicam  
98 (Covetrus, Portland, ME; 5 mg/kg), both SC. Postoperative analgesia consisted of a single  
99 administration of Buprenex (AmerisourceBergen Drug Corp, Sacramento, CA; 0.1 mg/kg)  
100 and Meloxicam 5 mg/kg, both SC, followed by Meloxicam at 24 and 48 hr. The following  
101 adeno-associated viruses (AAV) and tracers were used: AAV8-CMV-TurboRFP (UPenn  
102 Vector Core,  $1.19 \times 10^{14}$  gc/ml), AAV9-CAG-GFP (UNC Vector Core,  $2 \times 10^{12}$  gc/ml),  
103 AAV2-retro-CAG-GFP (Addgene,  $7 \times 10^{12}$  gc/ml), AAV2-retro-AAV-CAG-tdTomato  
104 (Addgene,  $7 \times 10^{12}$  gc/ml), Cholera toxin subunit B CF-640 (Biotium, 2 mg/ml, 100 nl),  
105 AAV1-hSyn-Cre-WPRE-hGH (Addgene,  $10^{13}$  gc/ml, diluted 1:5), AAV5-CAG-FLEX-  
106 tdtomato (UNC Viral Core,  $7.8 \times 10^{12}$  gc/ml, diluted 1:5), AAV9-EF1a-DIO-hChR2(H134R)-  
107 EYFP (Addgene,  $1.8 \times 10^{13}$  gc/ml, diluted 1:10), AAV2-hSyn-hChR2(H134R)-EYFP (UNC  
108 Vector Core,  $5.6 \times 10^{12}$  gc/ml, diluted 1:2). Three-five weeks were allowed for viral  
109 expression/labelling.

110

### 111 **2.3 Histology and imaging**

112 Following deep anesthesia (anesthetic cocktail: 100 mg/kg ketamine, 10 mg/kg xylazine, 1  
113 mg/kg acepromazine, IP) mice were paraformaldehyde-fixed (4% paraformaldehyde in 0.1  
114 M phosphate buffer, pH 7.4, EMS Diasum, Hatfield, PA) through transcardial perfusion.  
115 Brains were post-fixed overnight, cryo-protected with 30% sucrose in PBS and sliced  
116 coronally on a sliding microtome at 60-100  $\mu\text{m}$  thickness. Slices were mounted on slides  
117 with Mowiol-based mounting media and scanned using an Olympus VS120 Slide Scanner  
118 (Olympus, Germany) (resolution with 10x/0.4 N.A. lens at 488 nm: 645 nm in x,y). For  
119 immunohistochemistry, slices were blocked with 10% normal goat serum (NGS, Millipore,  
120 Burlington, MA) in PBST (0.3% Triton X-100 in PBS) for 1 h. Slices were incubated with  
121 primary antibodies (anti-Cre IgG1, Millipore, 1:1000; anti-NEUN, Cell Signaling, Danvers,  
122 MA, 1:1000; anti-vGLUT2, Synaptic Systems, Goettingen, Germany, 1:700; anti-PSD-95,  
123 Neuromab, Davis, CA, 1:500) in 2% NGS-PBST overnight at 4°C. After 4 x 20-min rinses  
124 with PBST, secondary antibodies (Alexa fluor-568 goat anti-mouse 1:1000 IgG1; Alexa  
125 fluor-488 goat anti-rabbit 1:1000; Dylight-405 goat anti-guinea pig 1:200; Alexa fluor-647  
126 goat anti-mouse 1:1000 IgG2a; Life Technologies, Carlsbad, CA) were applied in 2% NGS-  
127 PBST for 1-2 h at room temperature. Following another round of rinses, slices were  
128 mounted on slides with Mowiol and scanned on an LSM800 confocal microscope with  
129 Airyscan (resolution with 63x/1.4 N.A. oil lens at 488 nm: 120 nm in x,y, 350 nm in z) (Zeiss,  
130 Germany). Maximal projections of optical z-stacks were obtained with Zen software (Zeiss)  
131 and used for analysis.

132

### 133 **2.4 Preparation of brain slices for electrophysiology**

134 Mice of either sex were anesthetized through intraperitoneal injection of  
135 ketamine/xylazine/acepromazine anesthetic cocktail and transcardially perfused with ice-  
136 cold artificial cerebrospinal fluid (aCSF; in mM: 127 NaCl, 2.5 KCl, 1.25  $\text{NaH}_2\text{PO}_4$ , 25  
137  $\text{NaHCO}_3$ , 1  $\text{MgCl}_2$ , 2  $\text{CaCl}_2$ , 25 glucose; supplemented with 0.4 sodium ascorbate and 2  
138 sodium pyruvate;  $\sim 310$  mOsm). Brains were rapidly removed, blocked, and placed in  
139 choline slurry (110 choline chloride, 25  $\text{NaHCO}_3$ , 25 glucose, 2.5 KCl, 1.25  $\text{NaH}_2\text{PO}_4$ , 7  
140  $\text{MgCl}_2$ , 0.5  $\text{CaCl}_2$ , 11.6 sodium ascorbate, 3.1 sodium pyruvate;  $\sim 310$  mOsm). Coronal  
141 sections (250  $\mu\text{m}$ ) containing the thalamus were cut on a vibratome (Leica VT1200S) and  
142 allowed to recover in aCSF at 32°C for 25 min before moving to room temperature until

143 further use. All solutions were bubbled with 95% O<sub>2</sub>-5% CO<sub>2</sub> continuously. Chemicals were  
144 from Sigma.

145

## 146 **2.5 Electrophysiology**

147 Slices were mounted onto poly-L-lysine-coated glass coverslips and placed in a submersion  
148 recording chamber perfused with aCSF (2-3 ml/min) at near physiological temperature (30-  
149 32°C). Whole-cell voltage-clamp recordings were made from tdTomato+ (Figs. 3,5) or CtB+  
150 (Fig. 6) cells in the thalamus using borosilicate glass pipettes (3-5 MΩ) filled with internal  
151 solution containing (in mM): CsMSO<sub>3</sub> 120, CsCl 15, NaCl 8, TEA-Cl 10, HEPES 10, EGTA  
152 0.5, QX314 2, MgATP 4 and NaGTP 0.3, biocytin 0.3. Recordings were acquired in  
153 pClamp11 using a Multiclamp 700B amplifier (Molecular Devices, San Jose, CA), digitized  
154 at 20 kHz and low-pass filtered at 8 kHz. Membrane potential was maintained at -70 mV.  
155 Series resistance and leak current were monitored and recordings were terminated if either  
156 of these parameters changed significantly. Optical stimulation of ChR2+ fibers surrounding  
157 tdTomato+ or CtB+ thalamic neurons was performed under a 60x water immersion lens (1.0  
158 N.A.) of an Olympus BX51W microscope, using an LED system (Excelitas X-cite; or  
159 Prizmatix UHP-T) mounted on the microscope and driven by a Master9 stimulator (AMPI).  
160 Optical stimulation consisted of 488 nm light pulses (1-5 ms duration). Power density was  
161 set to 1.5-2x threshold (max: 0.25 mW/mm<sup>2</sup>). A minimum of 5 response-evoking trials (inter-  
162 trial interval: 60 s) were delivered and traces were averaged. To confirm monosynaptic  
163 inputs, action potentials were blocked with TTX (1 μM), followed by TTX+ 4AP (100 μM) to  
164 prolong ChR2-evoked depolarization <sup>42</sup>.

165

## 166 **2.6 Data analysis**

167 Analysis of ex vivo recordings was performed using custom MATLAB R2019b scripts  
168 (MathWorks, Natick, MA). Postsynaptic current (PSC) amplitude was computed from the  
169 maximum negative deflection from baseline within a time window (2.5 - 40 ms) from  
170 stimulus onset. Onset latency was measured at 10% of peak amplitude. Cell location was  
171 confirmed through biocytin-streptavidin Alexa fluor staining. For slice registration the  
172 Paxinos Brain Atlas (Paxinos and Franklin, 2001) and the Allen Brain Atlas (ABA\_v3) were  
173 used. Location of injection sites was identified and experiments were excluded if there was  
174 spill into neighboring nuclei. Cell counting and immunofluorescence intensity analyses were  
175 done by raters naïve to the experimental hypotheses using ImageJ (Fiji, National Institutes



176 of Health, Bethesda, Maryland) and Abode Illustrator. Statistical analysis was performed in  
177 Matlab (Mathworks) and Prism (GraphPad), with significance set at  $p < 0.05$ .

178

### 179 **3 Results**

#### 180 **3.1 Putative disynaptic pathways between cerebellar nuclei and BLA through the** 181 **limbic thalamus**

182 Given that microstimulation of DCN elicits short-latency responses in the BLA<sup>36–38</sup>, we  
183 hypothesized that an anatomical pathway exists between the two regions that involves at  
184 most 2 synapses. Initial anatomical tracing experiments did not support a direct DCN-BLA  
185 connection (not shown). We therefore performed simultaneous injections of an anterograde  
186 tracer virus (AAV8-CMV-TurboRFP) in the DCN and a retrograde tracer virus (AAV2-retro-  
187 CAG-GFP) in the BLA (**Fig. 1A,B**) to identify potential regions of overlap. In epifluorescence  
188 images of brain slices across different animals ( $N = 8$ ), the limbic thalamus consistently  
189 emerged as a prominent site of overlap (**Fig. 1C**). We use the term “limbic thalamus” to  
190 refer to a collection of non-sensorimotor thalamic nuclei, including the mediodorsal (MD),  
191 midline and intralaminar (IL) nuclei, with diverse projections to cortical (mainly medial  
192 prefrontal) and/or subcortical limbic structures<sup>43–46</sup>. Registration of images to the Allen  
193 Brain Atlas localized BLA-projecting thalamic neurons in multiple nuclei of the limbic  
194 thalamus (**Fig. 1D**), in agreement with known connectivity patterns<sup>46–49</sup>. Visual inspection of  
195 diffraction-limited epifluorescence images identified overlapping DCN axonal projections  
196 and BLA-projecting neurons in several (but not all) of these thalamic nuclei, including the  
197 parafascicular (PF) n. and subparafascicular area (SPA), the centromedial (CM) and MD  
198 nuclei, and other midline nuclei (**Fig. 1E**). Injection of the tracer cholera toxin subunit B  
199 (CtB)-CF640 in the limbic thalamus retrogradely labeled neurons in DCN (**Fig. 1F**),  
200 confirming the DCN-limbic thalamus connectivity.

201

#### 202 **3.2 Transneuronal anatomical tracing and optophysiology establish synaptic** 203 **connectivity between cerebellar nuclei and limbic thalamus**

204 To spatially resolve synaptic connectivity between DCN and BLA-projecting thalamic nuclei,  
205 we adopted an AAV-based transneuronal approach<sup>50</sup>. AAV1-Cre in presynaptic neurons is  
206 known to propagate across the synapse and induce expression of a floxed tag in  
207 postsynaptic neurons, thus identifying synaptic partners (**Fig. 2A**). We injected AAV1-Cre  
208 bilaterally in DCN and AAV-FLEX-tdTomato in thalamus and quantified the relative

209 distribution of tdTomato+ neurons in intralaminar and midline thalamic nuclei. Injection  
210 coverage for DCN was indicated by Cre immunofluorescence (**Fig. 2B1,2**) and included all  
211 cerebellar nuclei. Great care was taken to avoid spill to extracerebellar areas, which  
212 resulted in denser coverage of caudal DCN (**Fig. 2B3**). TdTomato+ neurons were observed  
213 throughout the limbic thalamus, confirming adequate coverage, and extended into  
214 ventromedial nuclei (**Fig. 2C**), which served as positive control<sup>51,52</sup>. Averaging the relative  
215 distribution of tdTomato+ neurons across five successful experiments revealed that the  
216 intralaminar cluster, comprised of centrolateral (CL), paracentral (PC), CM, and PF nuclei<sup>47</sup>,  
217 and MD nucleus encompassed most (~95%) tagged neurons (**Fig. 2C3**), suggesting that  
218 these nuclei reliably receive most cerebellar inputs to limbic thalamus.

219  
220 To confirm that the thalamic targets identified with the transneuronal Cre method receive  
221 cerebellar synaptic input, we performed optophysiological experiments in acute thalamic  
222 slices from mice injected with AAV1-Cre in the DCN and AAV-FLEX-tdTomato in the  
223 thalamus (**Fig. 3A**). To activate cerebellar inputs, channelrhodopsin (ChR2-H134R) was  
224 conditionally expressed in DCN through AAV-DIO-ChR2-EYFP injection. DCN axonal  
225 projections were stimulated in the thalamus with 488-nm light pulses applied through the  
226 objective. Light-evoked synaptic responses were monitored in whole-cell voltage-clamp  
227 recordings ( $V_m = -70$  mV) from thalamic neurons, which were selected based on tdTomato  
228 expression, their anatomical location and position in the slice, i.e., surrounded by ChR2-  
229 EYFP-expressing axons. In all thalamic nuclei examined ( $n = 29$  cells), light stimulation  
230 elicited synaptic responses (mean response in pA: IL:  $311.7 \pm 100$ ; MD:  $105.7 \pm 32.3$ ;  
231 midline:  $565.8 \pm 209.8$ ; VM/VPM:  $347.5 \pm 112.3$ ; LP:  $91.8 \pm 2.7$ ) (**Fig. 3B1**) with short  
232 latencies (mean latency in ms: IL:  $2.5 \pm 0.28$ ; MD:  $3.3 \pm 0.6$ ; midline:  $4.2 \pm 0.7$ ; VM/VPM:  $3.2$   
233  $\pm 0.2$ ; LP:  $2.9 \pm 0.8$ ) (**Fig. 3B2**). These data support the specificity of the anatomical  
234 connectivity and establish the existence of active DCN terminals (as opposed to just  
235 passing axons) across limbic thalamus.

### 236 237 **3.3 Thalamic neurons receiving cerebellar input project to BLA**

238 If the thalamus is a functional node of the disynaptic DCN-BLA circuit, then we would expect  
239 to find axons of DCN input-receiving thalamic neurons in BLA. To this end, we imaged BLA-  
240 containing slices from transsynaptic Cre experiments (**Fig. 4A**). We detected tdTomato+  
241 axons at several antero-posterior distances from bregma (**Fig. 4B1-B6**). Using



242 immunohistochemistry with antibodies against pre- and postsynaptic markers of excitatory  
243 synapses (vesicular glutamate transporter, vGLUT2; PSD-95), and super-resolution airyscan  
244 confocal imaging, we found tight colocalization between tdTomato+ axonal varicosities,  
245 vGLUT2 and PSD-95, an example of which is shown in **Fig. 4C**. This finding suggests that  
246 axons of thalamic neurons receiving cerebellar input form morphological synapses in the  
247 BLA. Axonal projections of DCN input-receiving thalamic neurons were also observed in  
248 other limbic regions including the nucleus accumbens core and shell (**Fig. 4D1,D2**) and  
249 anterior cingulate/prelimbic cortex (**Fig. 4D3,D4**).

250

### 251 **3.4 The centromedial and parafascicular nuclei emerge as functional nodes in** 252 **cerebello-amygdala circuit**

253 Our tracer overlap studies pointed to multiple thalamic nuclei as potential relays of  
254 cerebellar signals to BLA (Fig. 1E). Among them, the MD, CM and PF nuclei showed higher  
255 relative distribution of both BLA-projecting neurons and neurons that receive DCN input  
256 (Figs. 1D, 2C). For the remainder of this study, we focused on CM and PF nuclei and  
257 sought to substantiate their role as anatomical and functional relays of DCN-BLA  
258 connectivity through super-resolution microscopy and optophysiology.

259

260 Airyscan confocal imaging of slices from dual-tracer experiments (Fig. 1) revealed  
261 fluorescently labeled DCN axons (red) in contact with neurons that were retrogradely  
262 labeled from the BLA (green) in both CM (**Fig. 5A1,A2**) and PF (**Fig. 5A3-5**) nuclei. The  
263 existence of functional monosynaptic DCN-CM/PF connections was tested in the subset of  
264 electrophysiological experiments from Fig. 3 that targeted CM/PF neurons (**Fig. 5B**). Under  
265 basal conditions, CM/PF neurons received synaptic inputs from the DCN (at  $V_m = -70$  mV;  
266 average amplitude  $\pm$  SEM:  $-197.5$  pA  $\pm$   $-80.14$ ,  $n = 6$ ) (**Fig. 5C1,C5**) with short onset  
267 latency (average latency  $\pm$  SEM:  $2.4$  ms  $\pm$   $0.18$ ) (**Fig. 5C6**), which is consistent with direct  
268 monosynaptic connections. Application of the sodium channel blocker tetrodotoxin (TTX)  
269 abolished the inputs (average amplitude  $\pm$  SEM:  $-5.1$  pA  $\pm$   $-2.03$ ) (**Fig. 5C2,C4-5**), which  
270 recovered upon addition of the potassium channel blocker 4-AP (average amplitude  $\pm$  SEM:  
271  $-151.8$  pA  $\pm$   $-39.52$ ) (**Fig., 5C3-5**) (Friedman's non-parametric repeated measures ANOVA:  
272  $\chi^2_r = 9$ ,  $n = 6$ ,  $p = 0.008$ ; Dunn's multiple comparison test: Baseline vs TTX:  $p = 0.02$ ,  
273 Baseline vs TTX+4AP:  $p = 0.99$ ), confirming their monosynaptic nature.

274 Finally, we tested whether BLA is a target of DCN input-receiving CM/PF neurons (**Fig. 6**).  
275 We virally expressed ChR2 in DCN and stimulated cerebellar axonal projections in thalamic  
276 slices while recording from BLA-projecting CM/PF neurons (whole-cell voltage clamp mode,  
277  $V_m = -70$  mV), which were retrogradely labeled with CtB-CF568 in BLA (**Fig. 6A**).  
278 Optogenetic stimulation elicited reliable DCN-CM/PF synaptic responses (average  
279 amplitude  $\pm$  SEM:  $-104.1$  pA  $\pm$   $-37.1$ ,  $n = 8$ ) (**Fig. 6C,D1**) with short latency ( $3.35$  ms  $\pm$   $0.25$ )  
280 (**Fig. 6D2**). Combined with the imaging findings (Fig. 5), our electrophysiological results  
281 argue strongly for a DCN-BLA disynaptic circuit that recruits CM/PF nuclei as node.

282  
283

## 284 **4 Discussion**

285 Cerebellar connections with the amygdala have been posited previously but the  
286 neuroanatomical substrate of this connectivity has been elusive<sup>1,5,53</sup>. Here, we obtained  
287 insight into cerebello-amygdala circuitry by combining various tracing approaches with  
288 advanced imaging and optophysiology. We established the existence of a disynaptic circuit  
289 between cerebellar nuclei and BLA, thus providing the first blueprint of cerebello-amygdala  
290 connectivity at the mesoscale level. The circuit recruits at least the centromedial and  
291 parafascicular thalamic nuclei (Figs. 5,6), and most likely also other nuclei of the limbic  
292 thalamus (Fig. 1), as relay nodes. In addition, we identified the intralaminar thalamic cluster  
293 and MD nucleus as recipients of the majority of cerebellar inputs to limbic thalamus (Fig. 2).  
294 Finally, and in addition to BLA, we identified axonal projections of DCN input-receiving  
295 thalamic neurons in limbic regions such as nucleus accumbens core and shell and anterior  
296 cingulate/prelimbic cortex (Fig. 4).

297

### 298 **4.1 The limbic thalamus as a target of cerebellar inputs**

299 We targeted the limbic thalamus as a conduit of cerebello-amygdala communication  
300 because several of its nuclei foster BLA-projecting neurons in close proximity to DCN axons  
301 (Fig. 1). DCN projections to limbic thalamus have been observed before<sup>54–58</sup> but the  
302 existence of functional synaptic terminals has only been validated for centrolateral and PF  
303 intralaminar nuclei<sup>30,52</sup>, and never on amygdala-projecting neurons. Our optophysiological  
304 experiments also provided first evidence for the presence of active synaptic connections (as  
305 opposed to just passing axons) in paracentral and centromedial (part of intralaminar group),  
306 intermediodorsal and rhomboid (part of midline group), and mediodorsal nuclei (Fig. 3),

307 expanding the repertoire of non-motor cerebellar targets and paving the way for causal  
308 manipulations.

309

## 310 **4.2 Technical considerations**

311 To chart cerebello-amygdala neuroanatomical connections, we used powerful circuit  
312 mapping tools including anterograde and retrograde tracer viruses and the transneuronal  
313 AAV1-Cre approach<sup>50,59–61</sup>. A distinct advantage of our approach, which combined AAV1-  
314 Cre with viral injections of conditionally expressed fluorescent tracers (as opposed to  
315 reporter mouse lines), is the ability to definitively point to the thalamus as the source of the  
316 axonal projections in BLA, NAc and prelimbic cortex- as opposed to e.g., the VTA, which  
317 also receives DCN inputs and projects to these regions<sup>62–66</sup>. Thus, our approach enabled  
318 conclusive interpretation of anatomical connectivity results. On the flip side, injection  
319 coverage/spill and viral tropism<sup>61</sup> need to be considered. Tropism, in particular, could skew  
320 interpretation of disynaptic inputs, as some cell groups in the limbic thalamus might be more  
321 efficiently infected by AAVs. Tropism could also explain why recent efforts to trace di- and  
322 tri-synaptic cerebellar efferent pathways with herpes simplex viruses did not identify the  
323 CM/PF pathway to BLA<sup>67</sup>. Lastly, one potential concern could be the propensity of AAVs to  
324 be transported in the retrograde direction at high titers<sup>50,68</sup>. To remediate these concerns,  
325 we used strict inclusion criteria for injection sites; employed a combination of viral and non-  
326 viral anterograde and retrograde tracers; optimized viral titers so as to minimize retrograde  
327 transport; and confirmed circuit connections with slice optophysiology.

328

## 329 **4.3 Proposed functions of the DCN-BLA circuit**

330 Our discovery of the DCN-BLA connection through CM/PF provides an essential map for  
331 future investigation of circuit function. The circuit, which could account for the previously  
332 observed short-latency cerebello-amygdala responses<sup>37</sup>, could convey cerebellar  
333 information about prediction, salience and/or valence to BLA, shaped by the intrinsic,  
334 synaptic and integrative properties of the nodes. Indeed, the cerebellum is known to encode  
335 such information<sup>8,69–73</sup>, which is also seen in BLA<sup>35,74–79</sup>, and which is thought to be used  
336 by CM and PF during aversive conditioning, observational learning and reward-seeking  
337 behavior<sup>30,46,80–83</sup>.

338

339 The cellular targets of cerebello-thalamic axons in BLA remain to be determined but likely  
340 include at least BLA principle neurons, which are the major recipients of CM input <sup>84</sup>. The  
341 patterns of BLA ensemble activity triggered by distinct cerebello-thalamic inputs could serve  
342 different aspects of cerebellum-relevant emotional functionality, which includes modulation  
343 of anxiety and learned fear <sup>29,32,85–88</sup>; processing of facial emotional expressions <sup>89,90</sup>;  
344 regulation of emotional reactivity <sup>91,92</sup>; and even reward-driven motivated behavior <sup>27,31,93,94</sup>.

345

346 The BLA is not the sole nucleus in the amygdala complex that receives cerebellar signals <sup>95</sup>.  
347 Similarly, it is unlikely that the CM and PF are the only nuclei to serve cerebello-amygdala  
348 communication (our findings; and <sup>96</sup>). Further studies are warranted to delineate the  
349 complete neuroanatomical and functional landscape of cerebello-amygdala connectivity.  
350 Our findings constitute the first step toward this goal.

351 **5 References**

- 352 1. Strick, P. L., Dum, R. P. & Fiez, J. A. Cerebellum and Nonmotor Function. *Annual*  
353 *Review of Neuroscience* **32**, 413–434 (2009).
- 354 2. Buckner, R. L. The cerebellum and cognitive function: 25 years of insight from anatomy  
355 and neuroimaging. *Neuron* vol. 80 807–815 (2013).
- 356 3. Reeber, S. L., Otis, T. S. & Sillitoe, R. V. New roles for the cerebellum in health and  
357 disease. *Frontiers in Systems Neuroscience* **7**, (2013).
- 358 4. Strata, P. The Emotional Cerebellum. *Cerebellum* (2015) doi:10.1007/s12311-015-0649-  
359 9.
- 360 5. Adamaszek, M. *et al.* Consensus Paper: Cerebellum and Emotion. *The Cerebellum* **16**,  
361 552–576 (2017).
- 362 6. Liang, K. J. & Carlson, E. S. Resistance, vulnerability and resilience: A review of the  
363 cognitive cerebellum in aging and neurodegenerative diseases. *Neurobiology of*  
364 *Learning and Memory* (2019) doi:10.1016/j.nlm.2019.01.004.
- 365 7. Schmahmann, J. D. The cerebellum and cognition. *Neuroscience Letters* **688**, 62–75  
366 (2019).
- 367 8. Hull, C. Prediction signals in the cerebellum: beyond supervised motor learning. *eLife* **9**,  
368 (2020).
- 369 9. Ploghaus, A. *et al.* Dissociating pain from its anticipation in the human brain. *Science*  
370 **284**, 1979–1981 (1999).
- 371 10. Damasio, A. R. *et al.* Subcortical and cortical brain activity during the feeling of self-  
372 generated emotions. *Nat Neurosci* **3**, 1049–1056 (2000).
- 373 11. Ernst, M. Decision-making in a Risk-taking Task A PET Study.  
374 *Neuropsychopharmacology* **26**, 682–691 (2002).
- 375 12. Ahs, F. *et al.* Disentangling the web of fear: amygdala reactivity and functional  
376 connectivity in spider and snake phobia. *Psychiatry Res* **172**, 103–108 (2009).
- 377 13. Moulton, E. A., Schmahmann, J. D., Baccara, L. & Borsook, D. The cerebellum and pain:  
378 Passive integrator or active participator? *Brain Research Reviews* **65**, 14–27 (2010).
- 379 14. Moulton, E. A., Elman, I., Baccara, L. R., Goldstein, R. Z. & Borsook, D. The cerebellum  
380 and addiction: insights gained from neuroimaging research. *Addict Biol* **19**, 317–331  
381 (2014).
- 382 15. Guo, Z. *et al.* Brain areas activated by uncertain reward-based decision-making in  
383 healthy volunteers. *Neural Regen Res* **8**, 3344–3352 (2013).

- 384 16. Van Overwalle, F., Baetens, K., Mariën, P. & Vandekerckhove, M. Social cognition and  
385 the cerebellum: A meta-analysis of over 350 fMRI studies. *NeuroImage* **86**, 554–572  
386 (2014).
- 387 17. Guell, X., Gabrieli, J. D. E. & Schmahmann, J. D. Triple representation of language,  
388 working memory, social and emotion processing in the cerebellum: convergent evidence  
389 from task and seed-based resting-state fMRI analyses in a single large cohort.  
390 *NeuroImage* **172**, 437–449 (2018).
- 391 18. Ernst, T. M. *et al.* The cerebellum is involved in processing of predictions and prediction  
392 errors in a fear conditioning paradigm. *eLife* **8**, (2019).
- 393 19. Yin, Y. *et al.* Abnormal baseline brain activity in posttraumatic stress disorder: a resting-  
394 state functional magnetic resonance imaging study. *Neurosci. Lett.* **498**, 185–189  
395 (2011).
- 396 20. Roy, A. K. *et al.* Intrinsic functional connectivity of amygdala-based networks in  
397 adolescent generalized anxiety disorder. *J Am Acad Child Adolesc Psychiatry* **52**, 290-  
398 299.e2 (2013).
- 399 21. Parker, K. L., Narayanan, N. S. & Andreasen, N. C. The therapeutic potential of the  
400 cerebellum in schizophrenia. *Frontiers in Systems Neuroscience* **8**, 163 (2014).
- 401 22. Phillips, J. R., Hewedi, D. H., Eissa, A. M. & Moustafa, A. A. The Cerebellum and  
402 Psychiatric Disorders. *Frontiers in Public Health* **3**, (2015).
- 403 23. Schmahmann, J. D. & Sherman, J. C. The cerebellar cognitive affective syndrome. *Brain*  
404 **121**, 561–579 (1998).
- 405 24. Supple, W. F., Jr, Leaton, R. N. & Fanselow, M. S. Effects of cerebellar vermal lesions  
406 on species-specific fear responses, neophobia, and taste-aversion learning in rats.  
407 *Physiol. Behav.* **39**, 579–586 (1987).
- 408 25. Supple, W. F., Jr & Leaton, R. N. Cerebellar vermis: essential for classically conditioned  
409 bradycardia in the rat. *Brain Res.* **509**, 17–23 (1990).
- 410 26. Sebastiani, L., La Noce, A., Paton, J. F. & Ghelarducci, B. Influence of the cerebellar  
411 posterior vermis on the acquisition of the classically conditioned bradycardic response in  
412 the rabbit. *Exp Brain Res* **88**, 193–198 (1992).
- 413 27. Bauer, D. J., Kerr, A. L. & Swain, R. A. Cerebellar dentate nuclei lesions reduce  
414 motivation in appetitive operant conditioning and open field exploration. *Neurobiology of*  
415 *Learning and Memory* **95**, 166–175 (2011).



- 416 28. Lorivel, T., Roy, V. & Hilber, P. Fear-related behaviors in Lurcher mutant mice exposed  
417 to a predator. *Genes Brain Behav.* **13**, 794–801 (2014).
- 418 29. Otsuka, S. *et al.* Roles of Cbln1 in Non-Motor Functions of Mice. *J. Neurosci.* **36**,  
419 11801–11816 (2016).
- 420 30. Xiao, L., Bornmann, C., Hatstatt-Burklé, L. & Scheiffele, P. Regulation of striatal cells  
421 and goal-directed behavior by cerebellar outputs. *Nature Communications* **9**, (2018).
- 422 31. Carta, I., Chen, C. H., Schott, A. L., Dorizan, S. & Khodakhah, K. Cerebellar modulation  
423 of the reward circuitry and social behavior. *Science* **363**, eaav0581 (2019).
- 424 32. Frontera, J. L. *et al.* Bidirectional control of fear memories by cerebellar neurons  
425 projecting to the ventrolateral periaqueductal grey. *Nature Communications* **11**, (2020).
- 426 33. Han, J.-K. *et al.* Ablation of STAT3 in Purkinje cells reorganizes cerebellar synaptic  
427 plasticity in long-term fear memory network. *eLife* **10**, e63291 (2021).
- 428 34. Kelly, E. *et al.* Regulation of autism-relevant behaviors by cerebellar–prefrontal cortical  
429 circuits. *Nature Neuroscience* (2020) doi:10.1038/s41593-020-0665-z.
- 430 35. Janak, P. H. & Tye, K. M. From circuits to behaviour in the amygdala. *Nature* **517**, 284–  
431 292 (2015).
- 432 36. Snider, R. S. & Maiti, A. Cerebellar contributions to the Papez circuit. *J. Neurosci. Res.*  
433 **2**, 133–146 (1976).
- 434 37. Heath, R. G. & Harper, J. W. Ascending projections of the cerebellar fastigial nucleus to  
435 the hippocampus, amygdala, and other temporal lobe sites: evoked potential and  
436 histological studies in monkeys and cats. *Exp. Neurol.* **45**, 268–287 (1974).
- 437 38. Heath, R. G., Dempsey, C. W., Fontana, C. J. & Myers, W. A. Cerebellar stimulation:  
438 effects on septal region, hippocampus, and amygdala of cats and rats. *Biol. Psychiatry*  
439 **13**, 501–529 (1978).
- 440 39. Ito, M. Cerebellar circuitry as a neuronal machine. *Prog. Neurobiol.* **78**, 272–303 (2006).
- 441 40. O’Neill, P.-K., Gore, F. & Salzman, C. D. Basolateral amygdala circuitry in positive and  
442 negative valence. *Current Opinion in Neurobiology* **49**, 175–183 (2018).
- 443 41. Yizhar, O. & Klavir, O. Reciprocal amygdala–prefrontal interactions in learning. *Current*  
444 *Opinion in Neurobiology* **52**, 149–155 (2018).
- 445 42. Petreanu, L., Mao, T., Sternson, S. M. & Svoboda, K. The subcellular organization of  
446 neocortical excitatory connections. *Nature* **457**, 1142–1145 (2009).
- 447 43. Groenewegen, H. & Witter, M. Thalamus. in *The Rat Nervous System* (Academic Press,  
448 2004).

- 449 44. Morgane, P., Galler, J. & Mokler, D. A review of systems and networks of the limbic  
450 forebrain/limbic midbrain. *Progress in Neurobiology* **75**, 143–160 (2005).
- 451 45. Jones, EG. *The thalamus*. (Cambridge University Press, 2007).
- 452 46. Vertes, R. P., Linley, S. B. & Hoover, W. B. Limbic circuitry of the midline thalamus.  
453 *Neuroscience & Biobehavioral Reviews* **54**, 89–107 (2015).
- 454 47. Van der Werf, Y. D., Witter, M. P. & Groenewegen, H. J. The intralaminar and midline  
455 nuclei of the thalamus. Anatomical and functional evidence for participation in processes  
456 of arousal and awareness. *Brain Res. Brain Res. Rev.* **39**, 107–140 (2002).
- 457 48. Amir, A., Paré, J., Smith, Y. & Paré, D. Midline thalamic inputs to the amygdala:  
458 Ultrastructure and synaptic targets. *Journal of Comparative Neurology* (2018)  
459 doi:10.1002/cne.24557.
- 460 49. Hintiryan, H. *et al.* Connectivity characterization of the mouse basolateral amygdalar  
461 complex. *Nat Commun* **12**, 2859 (2021).
- 462 50. Zingg, B. *et al.* AAV-Mediated Anterograde Transsynaptic Tagging: Mapping  
463 Corticocollicular Input-Defined Neural Pathways for Defense Behaviors. *Neuron* **93**, 33–  
464 47 (2017).
- 465 51. Habas, C., Manto, M. & Cabaraux, P. The Cerebellar Thalamus. *The Cerebellum* (2019)  
466 doi:10.1007/s12311-019-01019-3.
- 467 52. Gornati, S. V. *et al.* Differentiating Cerebellar Impact on Thalamic Nuclei. *Cell Rep* **23**,  
468 2690–2704 (2018).
- 469 53. D’Angelo, E. & Casali, S. Seeking a unified framework for cerebellar function and  
470 dysfunction: from circuit operations to cognition. *Front Neural Circuits* **6**, 116 (2012).
- 471 54. Hendry, S. H. C., Jones, E. G. & Graham, J. Thalamic relay nuclei for cerebellar and  
472 certain related fiber systems in the cat. *The Journal of Comparative Neurology* **185**,  
473 679–713 (1979).
- 474 55. Haroian, A. J., Massopust, L. C. & Young, P. A. Cerebellothalamic projections in the rat:  
475 An autoradiographic and degeneration study. *The Journal of Comparative Neurology*  
476 **197**, 217–236 (1981).
- 477 56. Ichinohe, N., Mori, F. & Shoumura, K. A di-synaptic projection from the lateral cerebellar  
478 nucleus to the laterodorsal part of the striatum via the central lateral nucleus of the  
479 thalamus in the rat. *Brain Research* **880**, 191–197 (2000).
- 480 57. Fujita, H., Kodama, T. & du Lac, S. Modular output circuits of the fastigial nucleus for  
481 diverse motor and nonmotor functions of the cerebellar vermis. *eLife* **9**, e58613 (2020).

- 482 58. Judd, E. N., Lewis, S. M. & Person, A. L. Diverse inhibitory projections from the  
483 cerebellar interposed nucleus. *eLife* **10**, e66231 (2021).
- 484 59. Tervo, D. G. R. *et al.* A Designer AAV Variant Permits Efficient Retrograde Access to  
485 Projection Neurons. *Neuron* (2016) doi:10.1016/j.neuron.2016.09.021.
- 486 60. Zingg, B., Peng, B., Huang, J., Tao, H. W. & Zhang, L. I. Synaptic Specificity and  
487 Application of Anterograde Transsynaptic AAV for Probing Neural Circuitry. *The Journal*  
488 *of Neuroscience* **40**, 3250–3267 (2020).
- 489 61. Nectow, A. R. & Nestler, E. J. Viral tools for neuroscience. *Nat Rev Neurosci* **21**, 669–  
490 681 (2020).
- 491 62. Phillipson, O. T. Afferent projections to the ventral tegmental area of Tsai and  
492 interfascicular nucleus: A horseradish peroxidase study in the rat. *The Journal of*  
493 *Comparative Neurology* **187**, 117–143 (1979).
- 494 63. Kuroda, M., Murakami, K., Igarashi, H. & Okada, A. The Convergence of Axon  
495 Terminals from the Mediodorsal Thalamic Nucleus and Ventral Tegmental Area on  
496 Pyramidal Cells in Layer V of the Rat Prelimbic Cortex. *European Journal of*  
497 *Neuroscience* **8**, 1340–1349 (1996).
- 498 64. Beier, K. T. *et al.* Circuit Architecture of VTA Dopamine Neurons Revealed by  
499 Systematic Input-Output Mapping. *Cell* **162**, 622–634 (2015).
- 500 65. Breton, J. M. *et al.* Relative contributions and mapping of ventral tegmental area  
501 dopamine and GABA neurons by projection target in the rat. *Journal of Comparative*  
502 *Neurology* **527**, 916–941 (2019).
- 503 66. D’Ambra, A., Jung, S. J., Ganesan, S., Antzoulatos, E. G. & Fioravante, D. Cerebellar  
504 Activation Bidirectionally Regulates Nucleus Accumbens Shell and Core. *BioRxiv*  
505 <https://doi.org/10.1111/j.1460-9568.1996.tb01596.x>, (2020).
- 506 67. Pisano, T. J. *et al.* Homologous organization of cerebellar pathways to sensory, motor,  
507 and associative forebrain. *Cell Reports* **36**, 109721 (2021).
- 508 68. Rothermel, M., Brunert, D., Zabawa, C., Diaz-Quesada, M. & Wachowiak, M. Transgene  
509 Expression in Target-Defined Neuron Populations Mediated by Retrograde Infection with  
510 Adeno-Associated Viral Vectors. *Journal of Neuroscience* **33**, 15195–15206 (2013).
- 511 69. Ohmae, S. & Medina, J. F. Climbing fibers encode a temporal-difference prediction error  
512 during cerebellar learning in mice. *Nature Neuroscience* **18**, 1798–1803 (2015).
- 513 70. Wagner, M. J., Kim, T. H., Savall, J., Schnitzer, M. J. & Luo, L. Cerebellar granule cells  
514 encode the expectation of reward. *Nature* (2017) doi:10.1038/nature21726.

- 515 71. Ma, M. *et al.* Molecular layer interneurons in the cerebellum encode for valence in  
516 associative learning. *Nature Communications* **11**, (2020).
- 517 72. Bina, L., Romano, V., Hoogland, T. M., Bosman, L. W. J. & De Zeeuw, C. I. Purkinje  
518 cells translate subjective salience into readiness to act and choice performance. *Cell*  
519 *Reports* **37**, 110116 (2021).
- 520 73. Shuster, S. A. *et al.* The relationship between birth timing, circuit wiring, and  
521 physiological response properties of cerebellar granule cells. *Proc Natl Acad Sci USA*  
522 **118**, e2101826118 (2021).
- 523 74. Paton, J. J., Belova, M. A., Morrison, S. E. & Salzman, C. D. The primate amygdala  
524 represents the positive and negative value of visual stimuli during learning. *Nature* **439**,  
525 865–870 (2006).
- 526 75. Adolphs, R. What does the amygdala contribute to social cognition? *Annals of the New*  
527 *York Academy of Sciences* **1191**, 42–61 (2010).
- 528 76. Sengupta, A. *et al.* Basolateral Amygdala Neurons Maintain Aversive Emotional  
529 Salience. *J. Neurosci.* **38**, 3001–3012 (2018).
- 530 77. Zhang, X. & Li, B. Population coding of valence in the basolateral amygdala. *Nat*  
531 *Commun* **9**, 5195 (2018).
- 532 78. Gründemann, J. *et al.* Amygdala ensembles encode behavioral states. *Science* **364**,  
533 eaav8736 (2019).
- 534 79. Brockett, A. T., Vázquez, D. & Roesch, M. R. Prediction errors and valence: From single  
535 units to multidimensional encoding in the amygdala. *Behavioural Brain Research* **404**,  
536 113176 (2021).
- 537 80. Jeon, D. *et al.* Observational fear learning involves affective pain system and Cav1.2  
538 Ca<sup>2+</sup> channels in ACC. *Nat Neurosci* **13**, 482–488 (2010).
- 539 81. Sengupta, A. & McNally, G. P. A role for midline and intralaminar thalamus in the  
540 associative blocking of Pavlovian fear conditioning. *Front. Behav. Neurosci.* **8**, (2014).
- 541 82. Cover, K. K. & Mathur, B. N. Rostral Intralaminar Thalamus Engagement in Cognition  
542 and Behavior. *Front. Behav. Neurosci.* **15**, 652764 (2021).
- 543 83. Rizzi, G., Li, Z., Hogrefe, N. & Tan, K. R. Lateral ventral tegmental area GABAergic and  
544 glutamatergic modulation of conditioned learning. *Cell Reports* **34**, 108867 (2021).
- 545 84. Ahmed, N., Headley, D. B. & Paré, D. Optogenetic study of central medial and  
546 paraventricular thalamic projections to the basolateral amygdala. *Journal of*  
547 *Neurophysiology* **126**, 1234–1247 (2021).

- 548 85. Sacchetti, B., Sacco, T. & Strata, P. Reversible inactivation of amygdala and cerebellum  
549 but not perirhinal cortex impairs reactivated fear memories. *Eur. J. Neurosci.* **25**, 2875–  
550 2884 (2007).
- 551 86. Duvarci, S. & Pare, D. Amygdala Microcircuits Controlling Learned Fear. *Neuron* **82**,  
552 966–980 (2014).
- 553 87. Tovote, P., Fadok, J. P. & Lüthi, A. Neuronal circuits for fear and anxiety. *Nature*  
554 *Reviews Neuroscience* **16**, 317–331 (2015).
- 555 88. Rudolph, S. *et al.* Cerebellum-Specific Deletion of the GABAA Receptor  $\delta$  Subunit  
556 Leads to Sex-Specific Disruption of Behavior. *Cell Reports* **33**, 108338 (2020).
- 557 89. Wang, S. *et al.* The human amygdala parametrically encodes the intensity of specific  
558 facial emotions and their categorical ambiguity. *Nat Commun* **8**, 14821 (2017).
- 559 90. Ferrari, C., Oldrati, V., Gallucci, M., Vecchi, T. & Cattaneo, Z. The role of the cerebellum  
560 in explicit and incidental processing of facial emotional expressions: A study with  
561 transcranial magnetic stimulation. *NeuroImage* **169**, 256–264 (2018).
- 562 91. Turner, B. M. *et al.* The cerebellum and emotional experience. *Neuropsychologia* **45**,  
563 1331–1341 (2007).
- 564 92. Machado, C. J., Kazama, A. M. & Bachevalier, J. Impact of amygdala, orbital frontal, or  
565 hippocampal lesions on threat avoidance and emotional reactivity in nonhuman  
566 primates. *Emotion* **9**, 147–163 (2009).
- 567 93. Murray, E. A. The amygdala, reward and emotion. *Trends in Cognitive Sciences* **11**,  
568 489–497 (2007).
- 569 94. Peterson, T. C. *et al.* Behavior modification after inactivation of cerebellar dentate nuclei.  
570 *Behavioral Neuroscience* **126**, 551–562 (2012).
- 571 95. Magal, A. & Mintz, M. Inhibition of the amygdala central nucleus by stimulation of  
572 cerebellar output in rats: a putative mechanism for extinction of the conditioned fear  
573 response. *Eur. J. Neurosci.* **40**, 3548–3555 (2014).
- 574 96. Kang, S. *et al.* Recent Advances in the Understanding of Specific Efferent Pathways  
575 Emerging From the Cerebellum. *Front. Neuroanat.* **15**, 759948 (2021).  
576  
577



## 578 **6 Conflict of Interest**

579 The authors declare that the research was conducted in the absence of any commercial or  
580 financial relationships that could be construed as a potential conflict of interest.

581

## 582 **7 Author Contributions**

583 SJJ, KV and DF designed the study; SJJ, KV, AD, AP and YI performed experiments; SJJ,  
584 KV, EA and DF analyzed data; MB, EPF, JV, MFF, and MA assisted with cell counting; SJJ,  
585 KV, AD and DF wrote the manuscript with input from authors.

586

## 587 **8 Funding**

588 This work was supported by R21MH114178, NSF1754831, a NARSAD Young Investigator  
589 Grant, Brain Research Foundation grant BRFSG-2017-02, and a Whitehall Foundation  
590 research award to DF; a NARSAD 2018 Young Investigator Grant to EA; a UC Davis  
591 Provost's undergraduate fellowship to MA; a NIMH T32MH112507 fellowship to KV; and a  
592 NIH T32GM007377 and a UC Davis Dean's Distinguished Graduate Fellowships to AD.

593

## 594 **9 Acknowledgments**

595 We thank Dr. Brian Wiltgen of UC Davis for access to imaging equipment; and Fioravante  
596 lab members for comments on a previous version of the manuscript.

597

## 598 **10 Figure legends**

599 **Figure 1. Anatomical tracing uncovers putative disynaptic pathways from cerebellum**  
600 **to basolateral amygdala. A**, Unilateral injection sites for anterograde viral tracer in DCN  
601 **(A1, red)** and retrograde viral tracer in BLA **(A2, green)**. **B**, Mosaic epifluorescence images  
602 of injection sites in DCN **(B1-2)** and BLA **(B3)**. **C**, Mosaic epifluorescence images of  
603 overlapping DCN axons (red) and BLA-projecting neurons (green) in limbic thalamus. **D**,  
604 Relative distribution of BLA-projecting neurons across nuclei of the limbic thalamus,  
605 normalized to the total number of labeled neurons and averaged across experiments, as a  
606 function of distance from bregma. Antero-posterior coordinates for each nucleus are given  
607 in **Table 1**. **E**, Quantification of overlap between DCN axons and BLA-projecting thalamic  
608 neurons. Arrow length in radar plot indicates proportion (0-1) of experiments with overlap in  
609 each thalamic nucleus. **F1,F2**, Schematic and confocal image of injection site for retrograde  
610 tracer CtB CF-640 in limbic thalamus. **F3,F4**, CtB-labeled projection neurons (red) in DCN



611 at different distances from bregma. Insets show high-magnification images of areas in  
612 yellow squares. For all panels, numbers denote distance (in mm) from bregma. Scale bars:  
613 500  $\mu\text{m}$ .

614

615 **Figure 2. The intralaminar and mediodorsal nuclei are major cerebellar postsynaptic**  
616 **targets in limbic thalamus. A**, Schematic of experimental approach for disynaptic pathway  
617 tracing. **B1-B2**, Example images of bilateral Cre expression in DCN. Red:  
618 immunofluorescence for NeuN neural marker; Green: anti-Cre immunoreactivity; Yellow:  
619 merge. **B3**, Heatmap of Cre immunofluorescence in DCN, normalized to NeuN signal and  
620 averaged across experiments, as a function of distance (in mm) from bregma. **C1,C2**,  
621 Example images of thalamic neurons conditionally expressing tdTomato (red) upon  
622 transneuronal transfer of Cre from cerebellar presynaptic axons. Green: NeuN  
623 immunofluorescence. **C3**, Heatmap of relative distribution of tdTomato+ neurons across  
624 thalamic nuclei, normalized to total number of labeled neurons and averaged across  
625 experiments, as a function of distance from bregma. **C4-C7**, Example registration of  
626 tdTomato+ neurons to the Allen mouse brain atlas. Numbers at bottom denote distance (in  
627 mm) from bregma. Antero-posterior coordinates for each nucleus can be found in **Table 1**.  
628 Scale bars: 500  $\mu\text{m}$ .

629

630 **Figure 3. Electrophysiological validation of virally-identified cerebello-thalamic**  
631 **connectivity. A1**, Schematic of experimental approach for ex vivo optophysiology. **A2,A3**,  
632 Epifluorescence images of anterior (A2) and posterior (A3) thalamic slices acutely prepared  
633 for recordings. DCN input-receiving neurons are tdTomato+. Scale bars: 500  $\mu\text{m}$ . **B**,  
634 Average ( $\pm$  SEM) amplitude (**B1**) and onset latency (**B2**) of ChR2-evoked synaptic currents  
635 as a function of recording location in the thalamus. Intralaminar (IL) group: CL, PC, CM and  
636 PF; midline group: IMD and RH.

637

638 **Figure 4. Thalamic neurons receiving cerebellar input form synapses in basolateral**  
639 **amygdala and also target the nucleus accumbens and prelimbic cortex. A**, Schematic  
640 diagram of experimental approach. Targets of tdTomato+ axons of thalamic neurons  
641 receiving cerebellar input were identified through imaging. **B**, Mosaic confocal images of  
642 tdTomato+ axons along the anterior-posterior axis of the BLA. **C**, High resolution airyscan

643 confocal images of tdTomato+ axons in the BLA colocalizing with presynaptic (vGLUT2)  
644 (**C1**) and postsynaptic (PSD95) (**C2**) markers of excitatory synapses. Green: vGLUT2, gray:  
645 PSD95, yellow/white in **C3**: overlay. **D**, tdTomato+ axons in nucleus accumbens (**D1,D2**)  
646 and prelimbic cortex (**D3,D4**). Yellow squares in B1,B3,B5 and D1,D3 show zoom-in areas  
647 for B2,B4,B6 and D2,D4 images, respectively. Numbers at bottom of images indicate  
648 distance (in mm) from bregma. Scale bars: B1,B3,B5,D1,D3: 200  $\mu\text{m}$ ; B2,B4,B6,D2,D4: 50  
649  $\mu\text{m}$ ; C1-C3: 5  $\mu\text{m}$ .

650

651 **Figure 5. Centromedial and parafascicular neurons project to basolateral amygdala**  
652 **and receive functional monosynaptic input from the cerebellum. A1-A4**, Airyscan  
653 confocal images of DCN axons (red) and BLA-projecting neurons (green) in the  
654 centromedial (CM; **A1**) and parafascicular (PF; **A3**) thalamic nuclei. **A2, A4-5**, zoomed-in  
655 areas in yellow squares from **A1** and **A3**. Scale bars: **A1,A3**: 500  $\mu\text{m}$ ; **A2,A4**: 20  $\mu\text{m}$ ; **A5**: 5  
656  $\mu\text{m}$ . **B**, Schematic diagram of ex vivo optophysiology approach to test for monosynaptic  
657 connections between DCN and CM/PF thalamic n. **C1-C3**, Average ChR2-evoked synaptic  
658 current (teal), overlaid onto single trial responses (gray), at baseline (**C1**); upon addition of  
659 the action potential blocker tetrodotoxin (TTX, 1  $\mu\text{M}$ ) (**C2**); after further addition of the  
660 potassium channel blocker 4-aminopyridine (4AP, 100  $\mu\text{M}$ ) (**C3**). **C4**, Time course of wash-  
661 in experiment for the same example cell. **C5**, Summary of effects on amplitude (mean  $\pm$   
662 SEM) of ChR2-evoked synaptic responses for the indicated conditions. BslIn: baseline. **C6**,  
663 Average ( $\pm$  SEM) onset latency of ChR2-evoked responses at baseline.

664

665 **Figure 6. The centromedial and parafascicular thalamus is a functional node of the**  
666 **cerebello-amygdala circuit. A**, Experimental approach. **B**, Example BLA-projecting neuron  
667 in centromedial (CM) thalamus retrogradely labeled with CtB CF-568 (red) is also labeled  
668 with biocytin (green) through the patch pipette. Scale bar = 10  $\mu\text{m}$ . **C**, Example ChR2-  
669 evoked synaptic response. Average trace (teal) overlaid onto single trials (gray). **D1,D2**,  
670 Average ( $\pm$  SEM) amplitude (**D1**) and onset latency (**D2**) of ChR2-evoked synaptic currents  
671 at DCN-CM/PF synapses.

672

673 **Table 1. Anatomical abbreviations (in alphabetical order) and antero-posterior**  
674 **coordinates (in mm, from bregma)**

| <b>Abbreviation</b> | <b>Structure</b>                         | <b>AP coordinates</b> |
|---------------------|------------------------------------------|-----------------------|
| BLA                 | Basolateral amygdaloid nucleus           | -0.67 mm to -3.07 mm  |
| CeA                 | Central amygdala                         | -0.57 mm to -2.07 mm  |
| CL                  | Central lateral nucleus of the thalamus  | -0.97 mm to -1.97 mm  |
| CM                  | Central medial nucleus of the thalamus   | -0.67 mm to -1.97 mm  |
| DCN                 | Deep cerebellar nuclei                   |                       |
| IAM                 | Interanteromedial thalamic nucleus       | -0.77 mm to -1.07 mm  |
| IMD                 | Intermediodorsal nucleus of the thalamus | -0.87 mm to -2.07 mm  |
| Int                 | Interposed cerebellar nucleus            | -6.64 mm to -5.8 mm   |
| IntA                | - anterior part                          |                       |
| IntDL               | - dorsolateral part                      |                       |
| IntP                | - posterior part                         |                       |
| La                  | Lateral amygdaloid nucleus               | -0.87 mm to -2.47 mm  |
| Lat                 | Lateral cerebellar nucleus               | -6.36 mm to -5.68 mm  |
| LP                  | Lateral posterior thalamic nucleus       | -1.27 mm to -3.17 mm  |
| Med                 | Medial cerebellar nucleus                | -6.84 mm to -5.88 mm  |
| MD                  | Mediodorsal nucleus of the thalamus      | -0.57 mm to -1.97 mm  |
| NAc                 | Nucleus accumbens                        |                       |
| PC                  | Paracentral nucleus of the thalamus      | -1.07 mm to -1.87 mm  |
| PF                  | Parafascicular nucleus                   | -1.97 mm to -2.37 mm  |
| PVT                 | Paraventricular thalamus                 | -0.17 mm to -2.07 mm  |
| PoMn                | Posteromedian thalamic nucleus           |                       |
| PrL                 | Prelimbic cortex                         |                       |
| RE                  | Reuniens thalamic nucleus                | -0.37 mm to -1.77 mm  |
| RH                  | Rhomboid thalamic nucleus                | -0.77 mm to -1.67 mm  |
| SPA                 | Subparafascicular area                   | -2.07 mm to -2.27 mm  |
| VL                  | Ventrolateral thalamic nucleus           | -0.67 mm to -2.27 mm  |
| VM                  | Ventromedial thalamic nucleus            | -0.67 mm to -2.07 mm  |

Figure 1  
Jung et al., 2022

A1

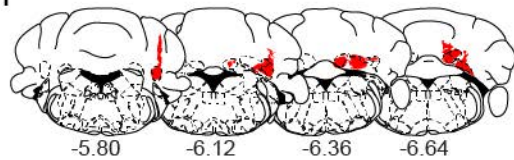

A2

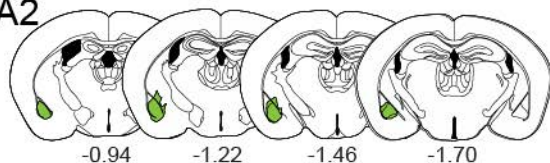

D

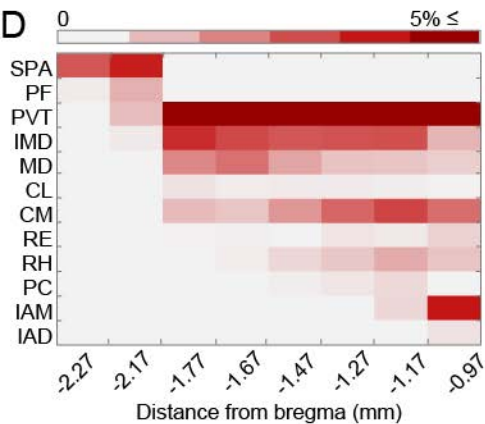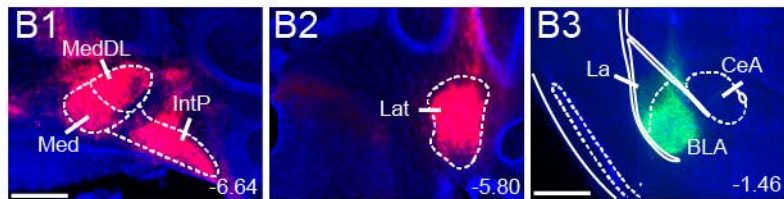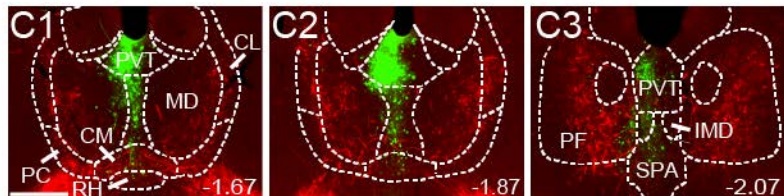

E

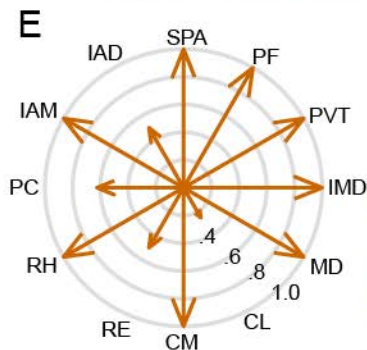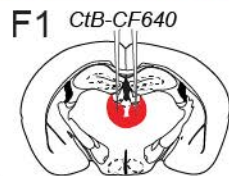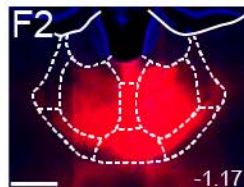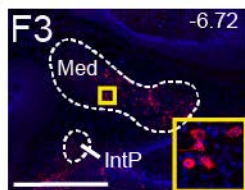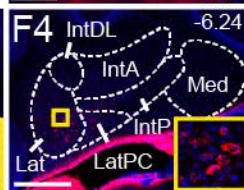



Figure 2  
Jung et al., 2022

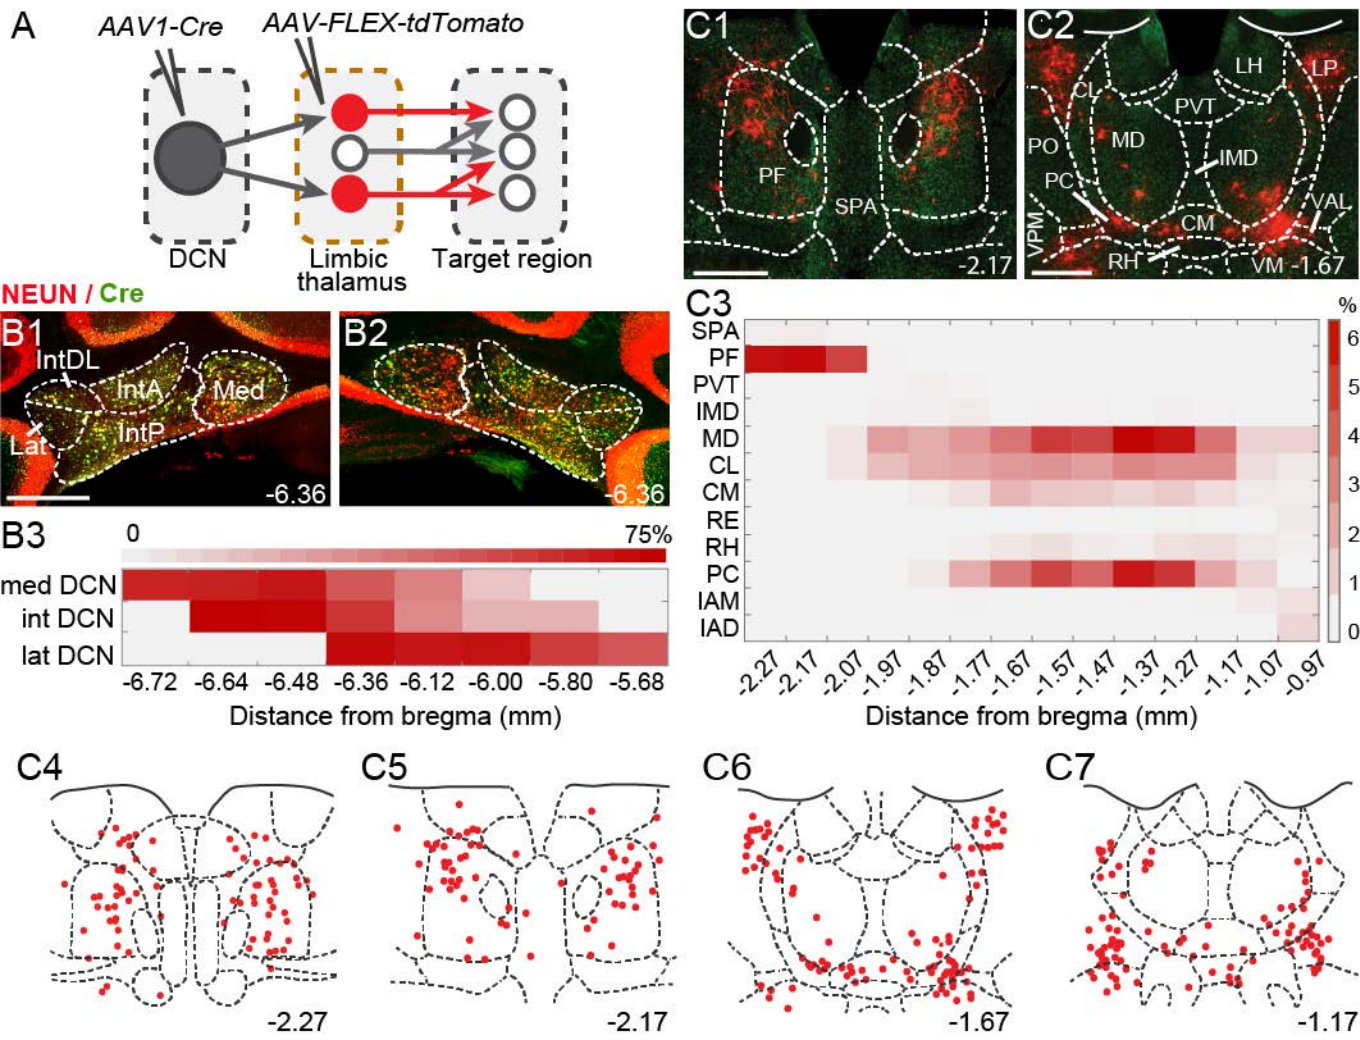

Figure 3  
Jung et al., 2022

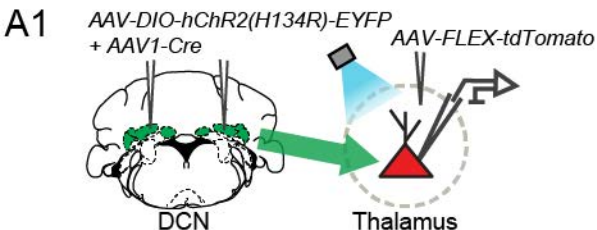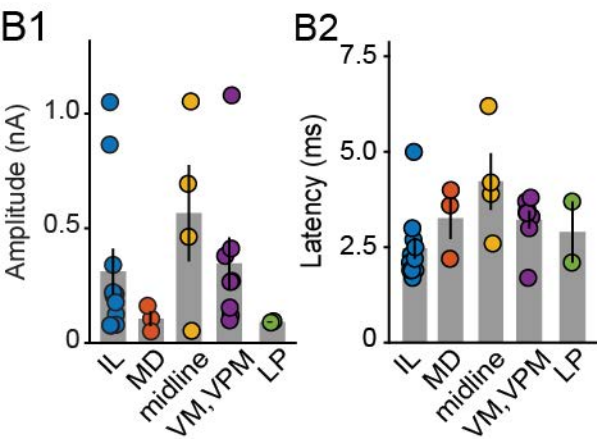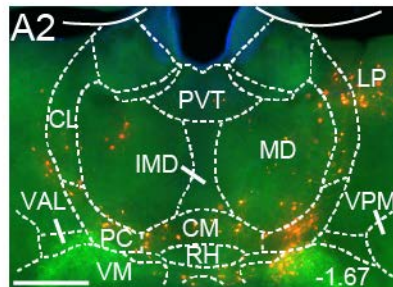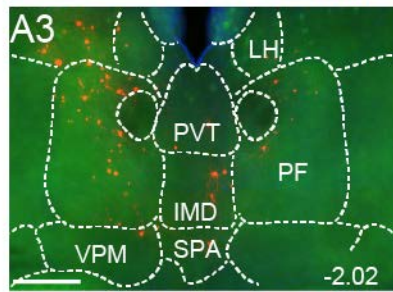



Figure 4  
Jung et al., 2022

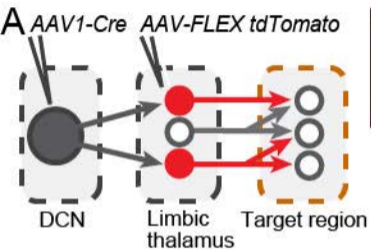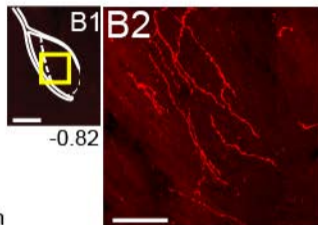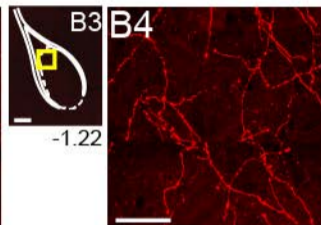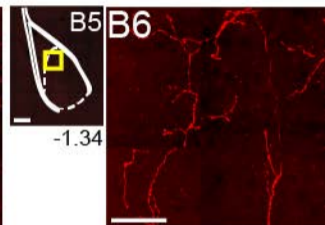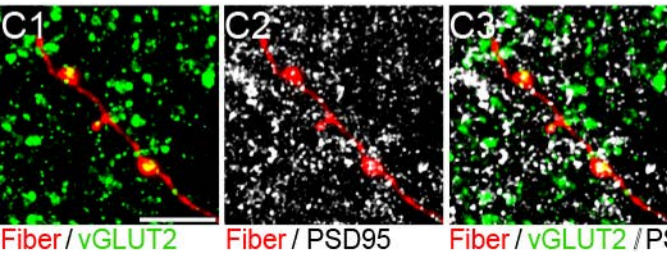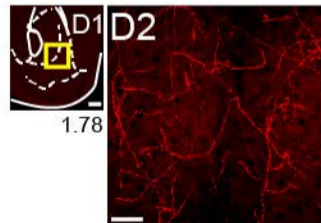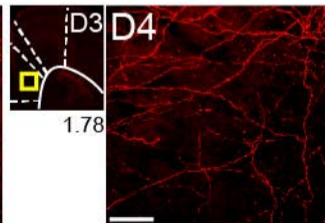

Figure 5  
Jung et al., 2022

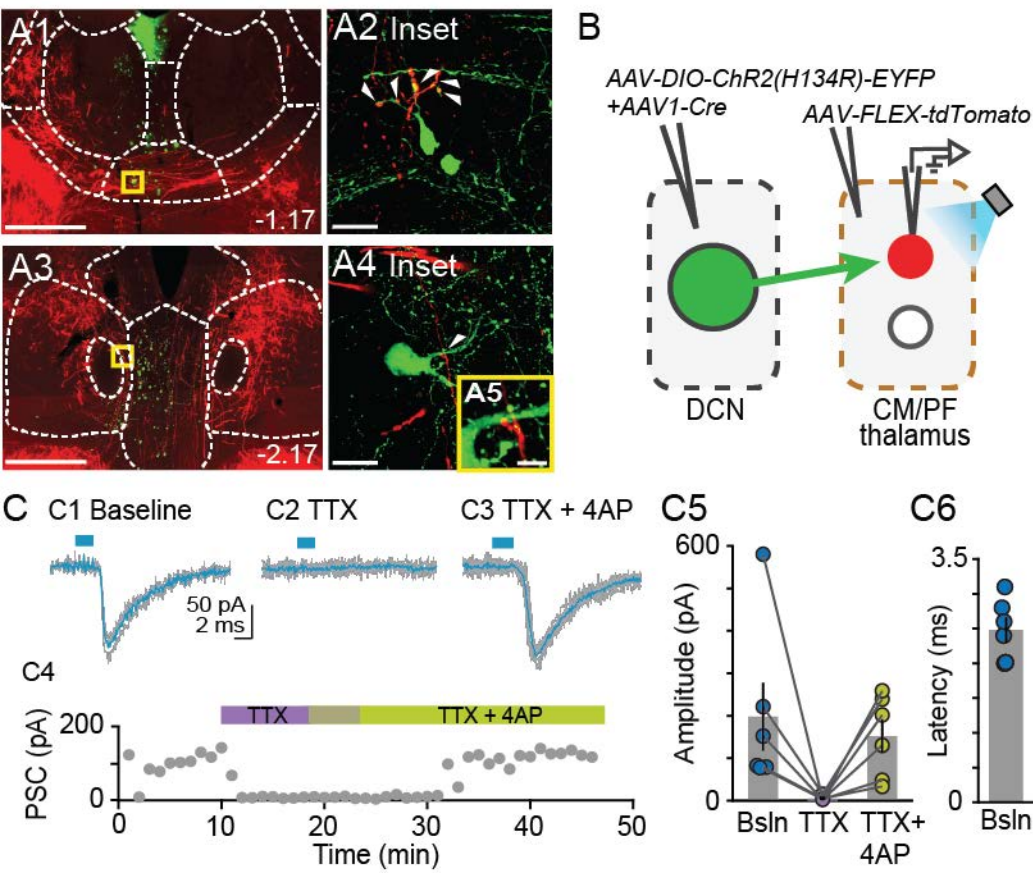

Figure 6  
Jung et al., 2022

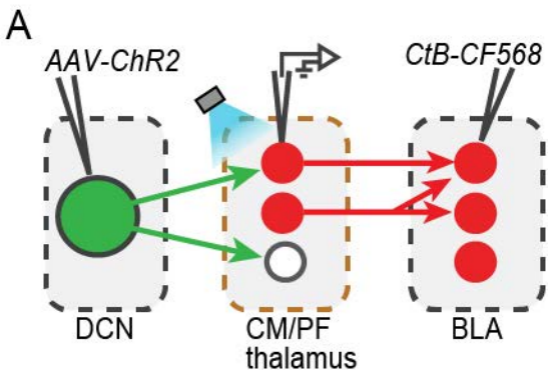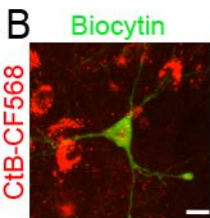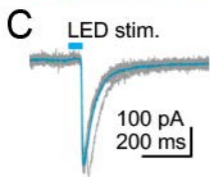

**D1**

Amplitude (pA)

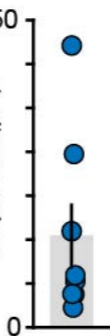

**D2**

Latency (ms)

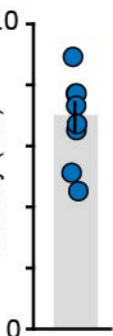

Source: https://www.biorxiv.org/content/10.1101/2022.02.07.479043v1.full.pdf
